# Supplementary material for: Root-Associated Microbiomes, Growth and Health of Ornamental Geophytes Treated with Commercial Plant Growth-Promoting Products
Source: MDPI journal article supplement (doi:10.3390/microorganisms9081785), 2021-08-23
Supplement: s1 [file s1]

## Root-associated microbiomes, growth and health of ornamental geophytes treated with commercial plant growth-promoting products

<sup>1</sup> Department of Agroecology and Plant Health, The Robert H. Smith Faculty of Agriculture, Food and Environment, The Hebrew University of Jerusalem, Rehovot, Israel; gavrielf@volcani.agri.gov.il (G.F.); noamr@volcani.agri.gov.il (N.R.); michal.sharon78@gmail.com (M.S.C.); vhnrcarmi@volcani.agri.gov.il (N.C.); zohar.kerem@mail.huji.ac.il (Z.K.)

<sup>3</sup> Department of Biochemistry, Food Science and Nutrition, The Robert H. Smith Faculty of Agriculture, Food and Environment, The Hebrew University of Jerusalem, Rehovot, Israel;

Received: date; Accepted: date; Published: date

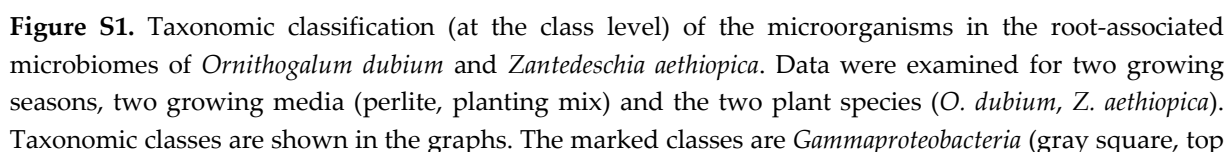

frame) to which *Pectobacterium* belongs, *Bacilli* (deep blue square, middle frame) to which the *Bacillus* spp. found in the Ecosense and Rhizoctol treatments belong, and unassigned sequences (light blue, bottom frame).

A.

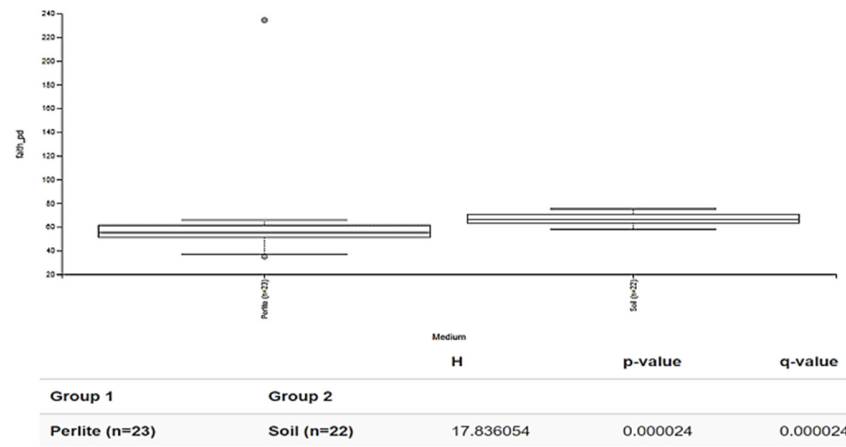

B.

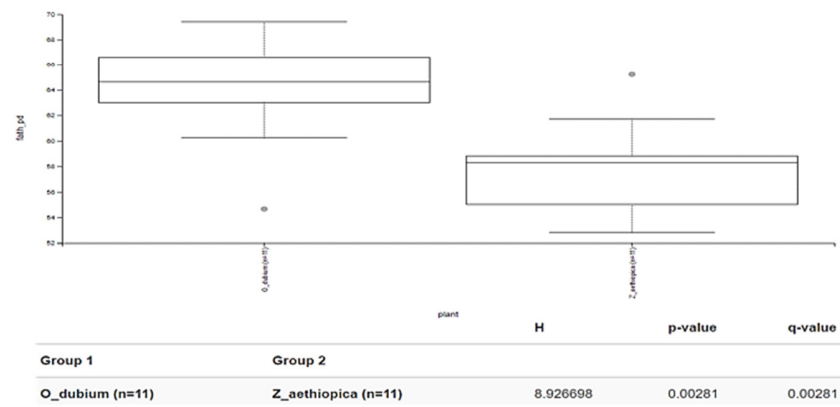

**Figure S2.** Microbial population dynamics by growing medium and plant species. A Faith PD test was used to compare the bacterial populations in the root-associated environment of two different geophyte species subjected to the different growth-promoting treatments: (A) growing medium and (B) plant species. Data analysis was performed using variance analysis (PERMANOVA;  $p \leq 0.0001$ ).

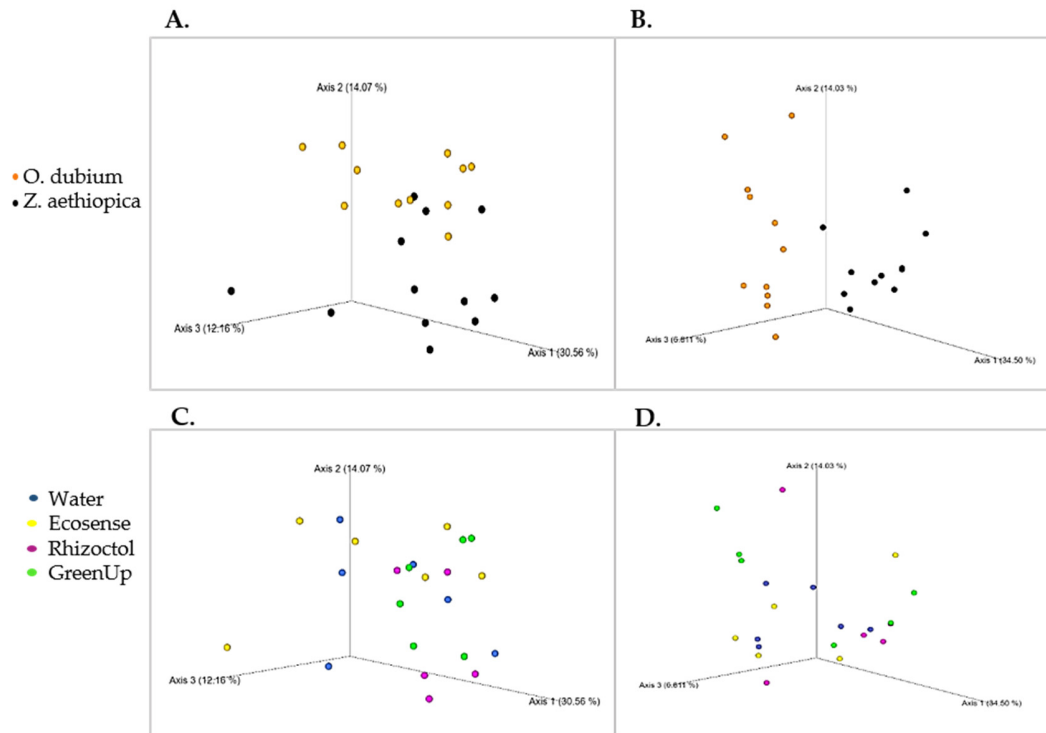

**Figure S3.** Principal-coordinate analysis (PCoA) plots of weighted Unifrac distance metrics of bacterial populations surrounding the roots of *Ornithogalum dubium* and *Zantedeschia aethiopica*. Data from different years were analyzed separately. (A) Plant species in the perlite: *O. dubium* in orange, *Z. aethiopica* in black. (B) Plant species in the planting mix medium: *O. dubium* in orange, *Z. aethiopica* in black. (C) Growth-promoting treatments in the perlite: water (control; blue), Ecosense (yellow), Rhizoctol (purple) and GreenUp (green). (D) Growth-promoting treatments in the planting mix: water (control; blue), Ecosense (yellow), Rhizoctol (purple) and GreenUp (green). Each data point represents sequences from a single soil sample; each plot includes all of the samples collected during that growing season.
